# Supplementary material for: Genome-wide mutational landscape of mucinous carcinomatosis peritonei of appendiceal origin
Source: PubMed Central journal article supplement (PMC4062050; doi:10.1186/gm559), 2014-05-29
Supplement: gm559-S1.pdf [file gm559-S1.pdf]

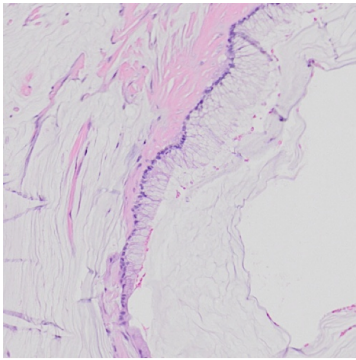

Patient-ID AA1716  
Age 59  
Gender Male  
Site of origin Peritoneal metastasis  
Grade Low-grade  
Description A strip of neoplastic mucinous epithelium is seen with low grade cytologic and architectural features in a background of abundant extracellular mucin.

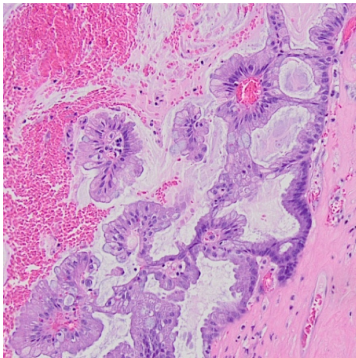

Patient-ID App2312  
Age 64  
Gender Female  
Site of origin Peritoneal metastasis  
Grade Low-grade  
Description Papillary and glandular formations of neoplastic mucinous epithelium are seen with low grade cytologic and architectural features in a background of extracellular mucin and blood.

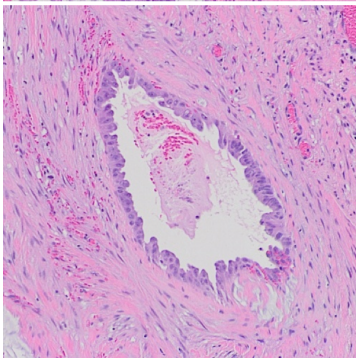

Patient-ID AA1816  
Age 42  
Gender Male  
Site of origin Peritoneal metastasis  
Grade Low-grade  
Description A single glandular structure composed of neoplastic mucinous epithelium with low grade cytologic and architectural features is seen embedded in fibrous tissue.

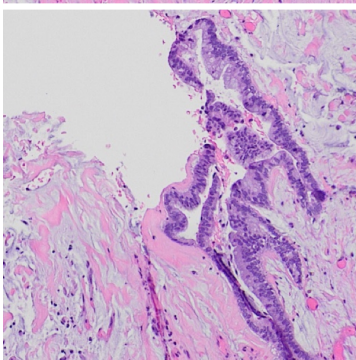

Patient-ID AA1830  
Age 72  
Gender Female  
Site of origin Peritoneal metastasis  
Grade Low-grade  
Description Strips of neoplastic mucinous epithelium are seen with low grade cytologic and architectural features, associated with abundant extracellular mucin.

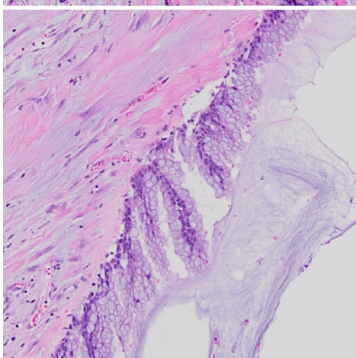

Patient-ID AA1924  
Age 62  
Gender Male  
Site of origin Peritoneal metastasis  
Grade Low-grade  
Description Strips and papillary formations of neoplastic mucinous epithelium are seen with low grade cytologic and architectural features, associated with abundant extracellular mucin.

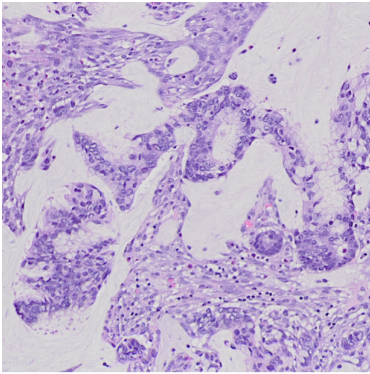

Patient-ID AA1934  
Age 50  
Gender Female  
Site of origin Peritoneal metastasis  
Grade High-grade  
Description Crowded aggregates of floating neoplastic mucinous epithelium are seen with complex architecture and high grade cytologic features.

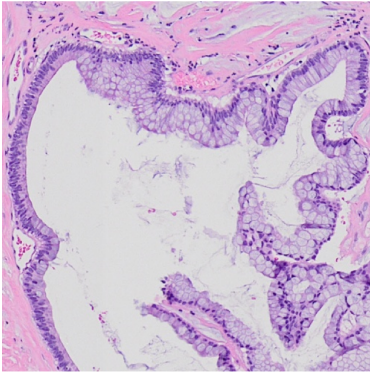

Patient-ID AA2004  
Age 34  
Gender Female  
Site of origin Peritoneal metastasis  
Grade Low-grade  
Description Strips of neoplastic mucinous epithelium are seen with low grade cytologic and architectural features, associated with abundant extracellular mucin.

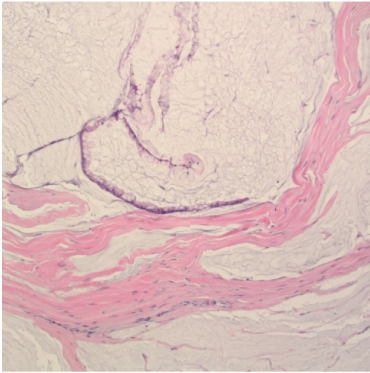

Patient-ID AA2021  
Age 45  
Gender Female  
Site of origin Peritoneal metastasis  
Grade Low-grade  
Description Small strip of neoplastic mucinous epithelium with low grade cytologic and architectural features is seen associated with abundant extracellular mucin.

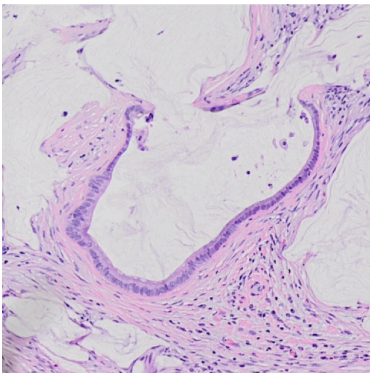

Patient-ID AA2051  
Age 51  
Gender Female  
Site of origin Peritoneal metastasis  
Grade Low-grade  
Description A strip of neoplastic mucinous epithelium is seen with low grade cytologic and architectural features, associated with abundant extracellular mucin.

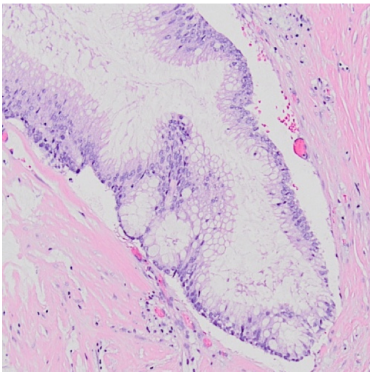

Patient-ID AA2055  
Age 54  
Gender Male  
Site of origin Peritoneal metastasis  
Grade Low-grade  
Description A strip of neoplastic mucinous epithelium is seen with low grade cytologic and architectural features, associated with abundant extracellular mucin.

**Figure S1:** H&E stained histology sections from the discovery group. The sections presented were selected as representing the diagnosis of the patient, including histological grade, and containing a high fraction of tumor cells for visualization purpose. For each section, the location, grade and description of the area displayed are indicated.

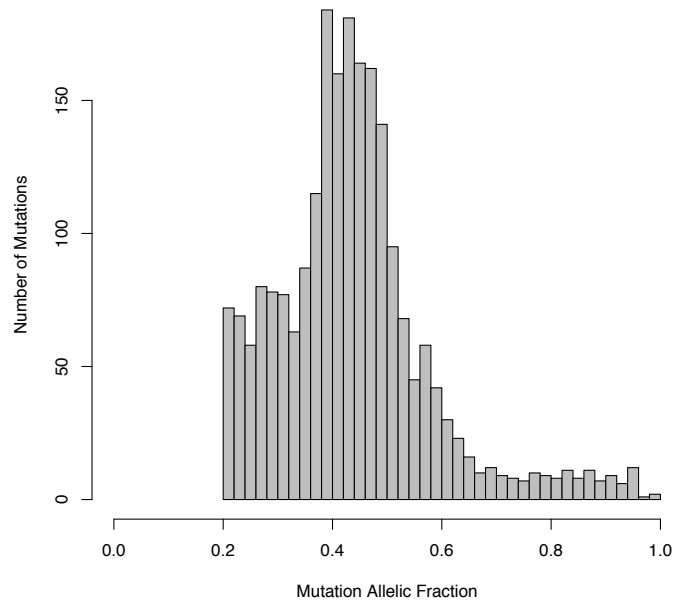

**Figure S2:** Distribution of the Mutant Allelic Fraction at all positions determined to be somatically mutated by whole exome sequencing of 10 MCPs.

**a**

| Patient ID | Specimen | Gene | Mutation | Chr   | Coord    | Ref | Alt | Blood        |              |                  | Tumor        |              |                  |
|------------|----------|------|----------|-------|----------|-----|-----|--------------|--------------|------------------|--------------|--------------|------------------|
|            |          |      |          |       |          |     |     | Ref coverage | Alt Coverage | Allelic Fraction | Ref Coverage | Alt Coverage | Allelic Fraction |
| AA1811     | MCP      | KRAS | G12V     | chr12 | 25398284 | C   | A   | 198236       | 153          | 0.08%            | 95681        | 1227         | 1.27%            |
| AA1811     | LMNA     | KRAS | G12V     | chr12 | 25398284 | C   | A   | 198239       | 153          | 0.08%            | 180783       | 4488         | 2.42%            |
| AA1811     | MCP      | GNAS | R201C    | chr20 | 57484420 | C   | T   | 177522       | 218          | 0.12%            | 117171       | 4074         | 3.36%            |
| AA1811     | LMNA     | GNAS | R201C    | chr20 | 57484420 | C   | T   | 177524       | 218          | 0.12%            | 249506       | 8961         | 3.47%            |

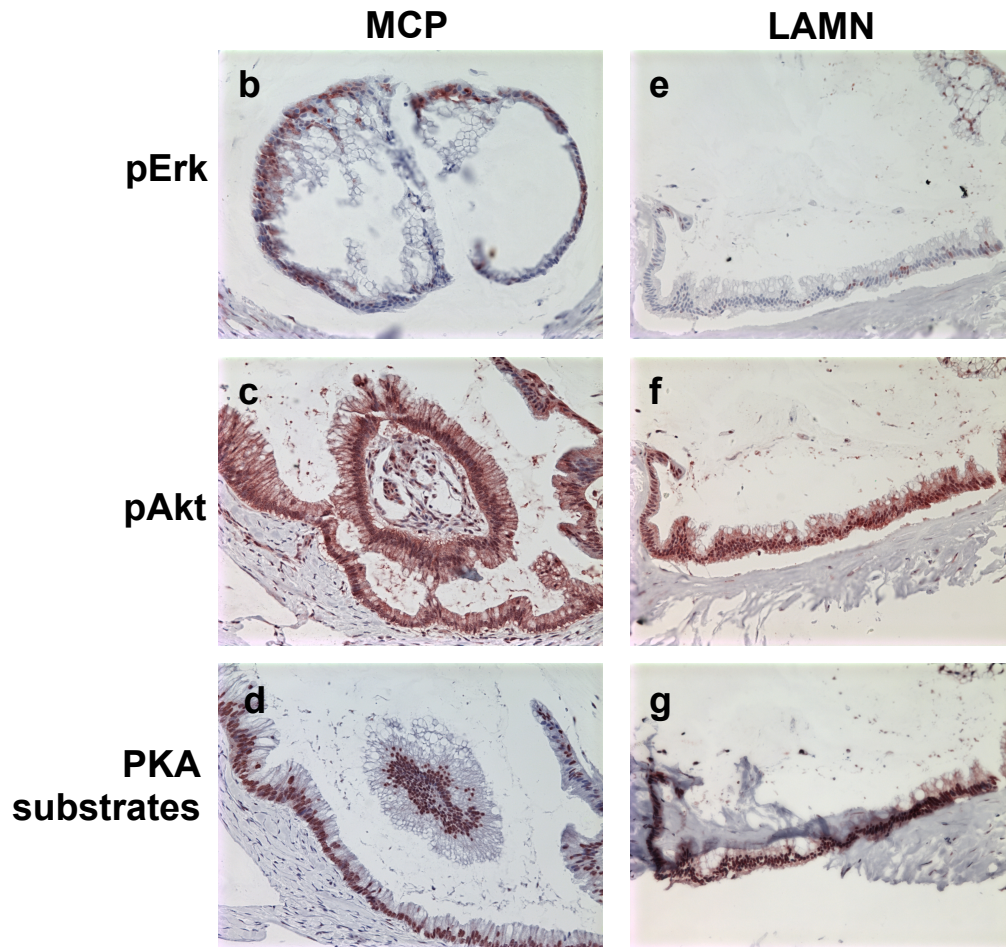

**Figure S3: Analysis of matched low-grade MCP and primary LAMN from patient AA1811. (a)** Summary table presenting the coverage and mutant allelic fraction observed at KRAS G12V and GNAS R201C mutations in both specimen. **(b-g) Immunohistochemistry.** The low grade MCP **(b-d)** and matched primary LAMN **(e-f)** sections were stained using Anti-pErk staining **(b,e)**, Anti-pAkt staining **(c,f)** and Anti-phospho-PKA substrates **(d,g)**.

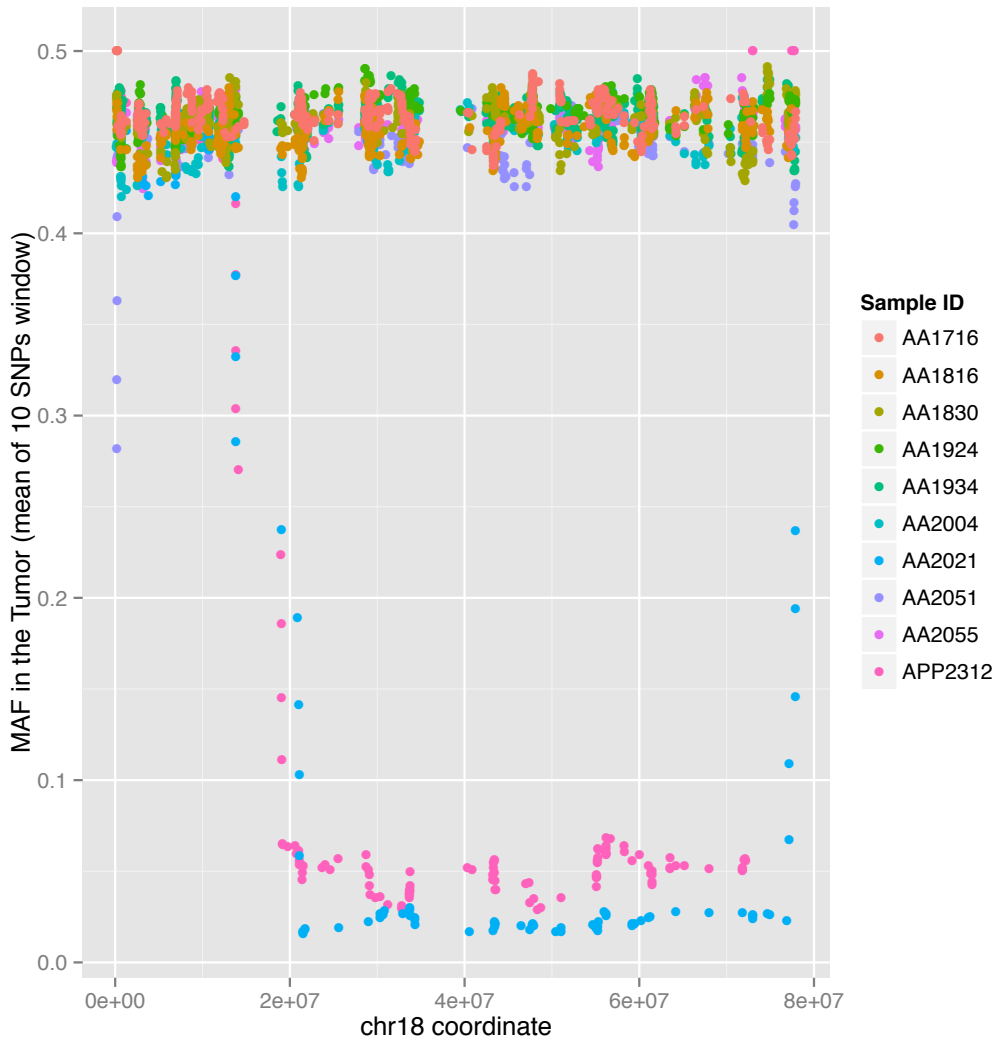

**Figure S4: Evidence of chromosome 18 Loss of Heterozygosity.** The minor allele frequency observed in the tumor at chromosome 18 heterozygous SNPs. We selected SNPs with Normal Allele frequency between 0.3 and 0.7 and cumulative coverage in normal and tumor greater than 100 fold.

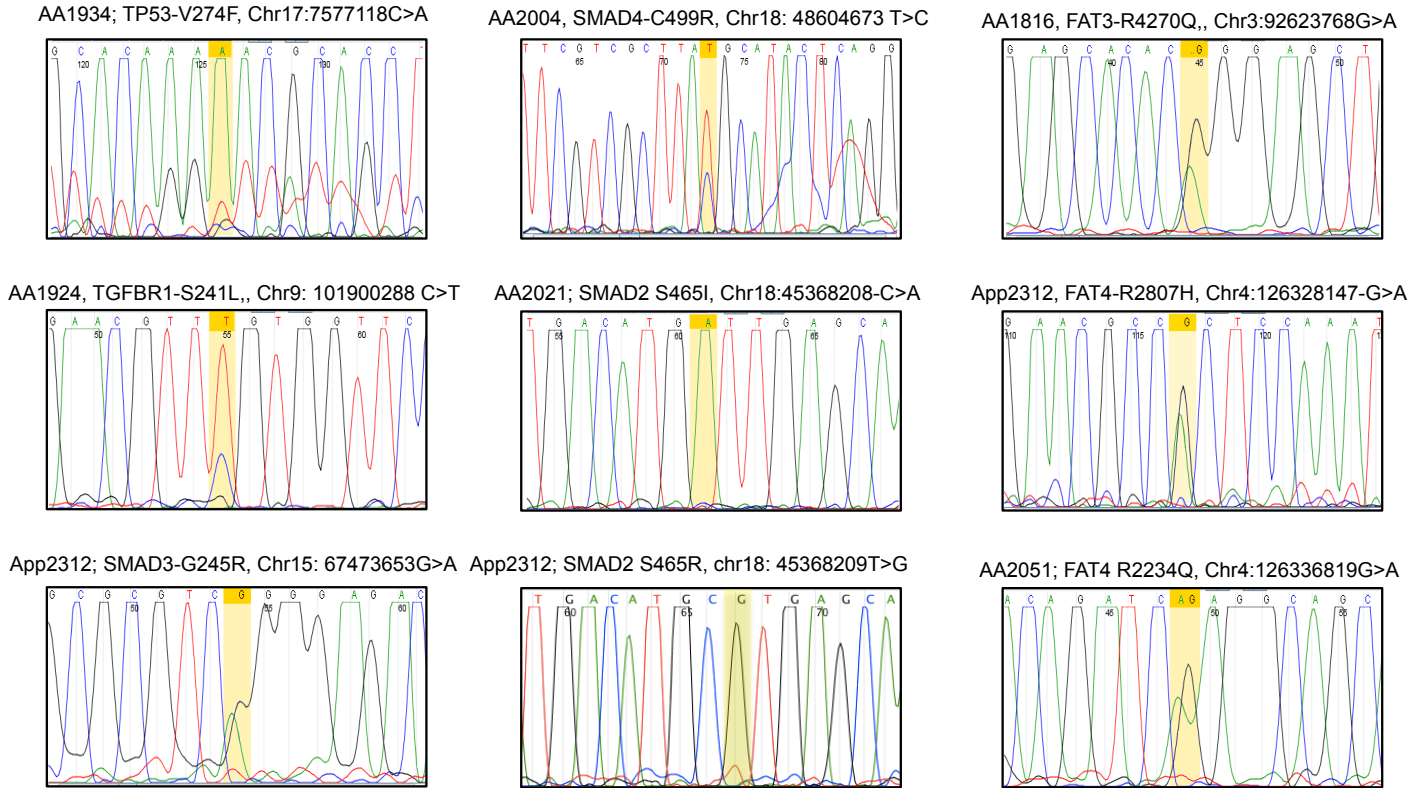

**Figure S5:** Confirmation by Sanger sequencing of the coding mutations identified in the discovery group in the genes TP53, FAT3/4, SMAD2/3/4 and TFBR1/2. Above each panel the samples, the coding mutations as well as nucleic acid substitution are indicated.

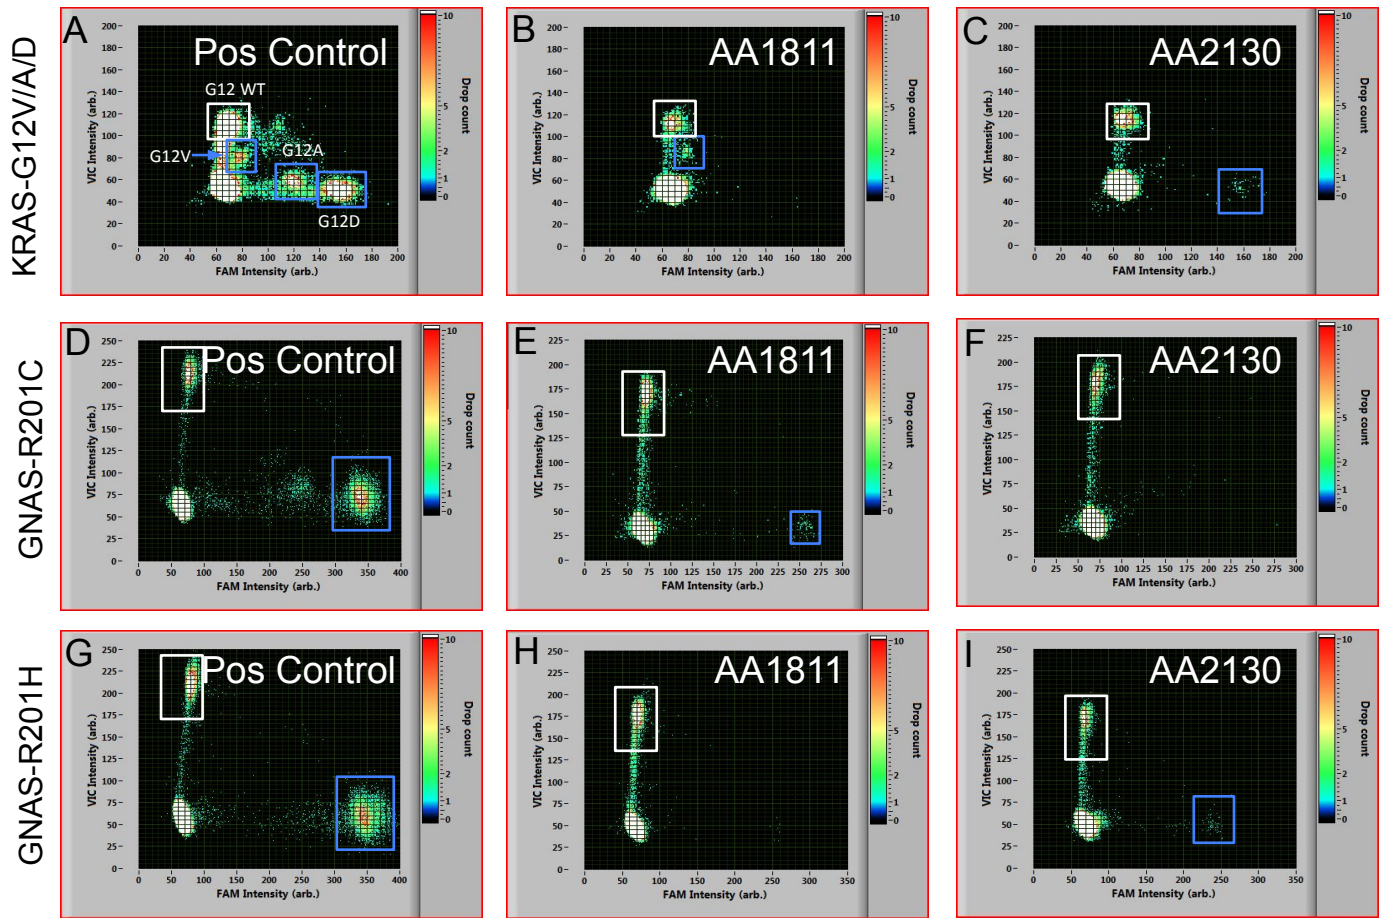

**Figure S6: Digital Droplet PCR.** Representative 2D histograms displaying the distribution of droplets (colored dots) as a function of the intensity in WT probe fluorescence (y axis) versus mutant probe fluorescence (x axis). Clusters of droplets are framed in white (WT) or blue (mutant) **(A-C)** KRAS-G12V/A/D assay, representing a positive control containing three mutations (A) along a G12V positive (B) and a G12D positive sample (C). **(D-F)** GNAS-R201C assay representing a positive control (D: AA2051 after LMD) along with positive (E) and negative (F) samples. **(G-I)** GNAS-R201H assay representing a positive control (G: AA2004 after LMD) along with negative (H) and positive (I) samples.
